# Supplementary material for: Induced Pluripotent Stem Cell Derivation and Ex Vivo Gene Correction Using a Mucopolysaccharidosis Type 1 Disease Mouse Model
Source: Hindawi journal article supplement (doi:10.1155/2019/6978303), 2019-04-01
Supplement: f1 [file 6978303.f1.pdf]

## Supplementary Figure 1

**A**

Mus musculus strain C57BL/6J chromosome 5  
Idua gene (Ch5. 108,660,331~108,685,446)

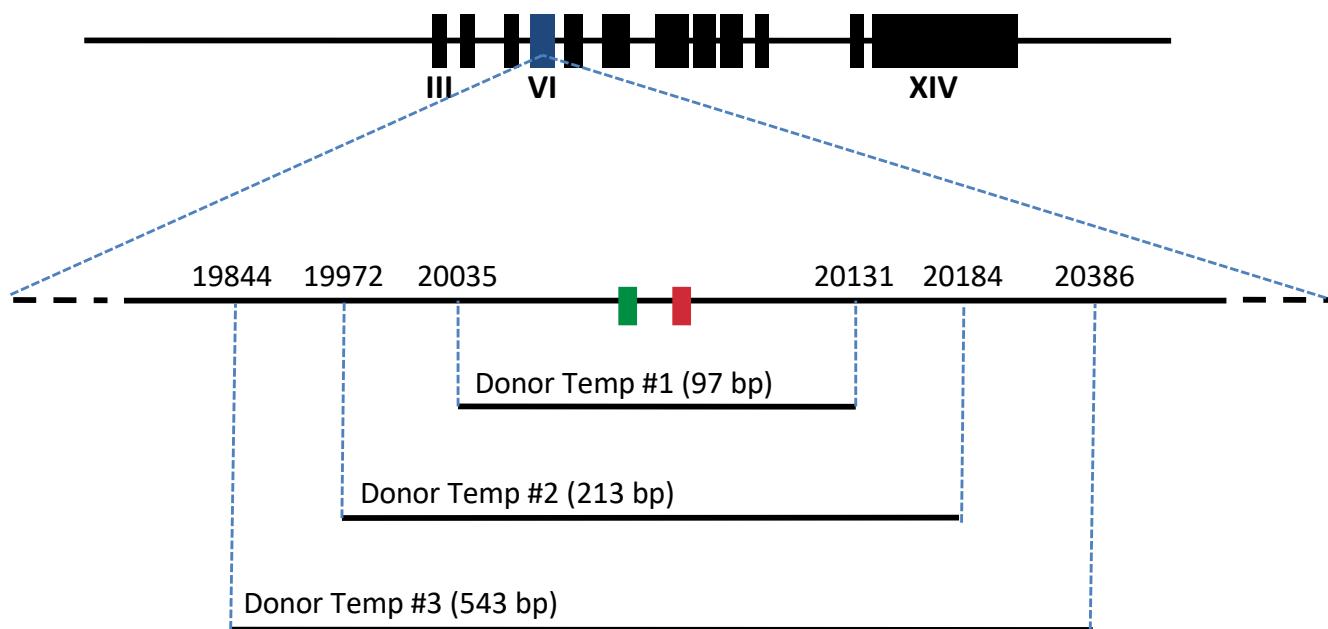

# B

### Post gene editing validation sequencing results

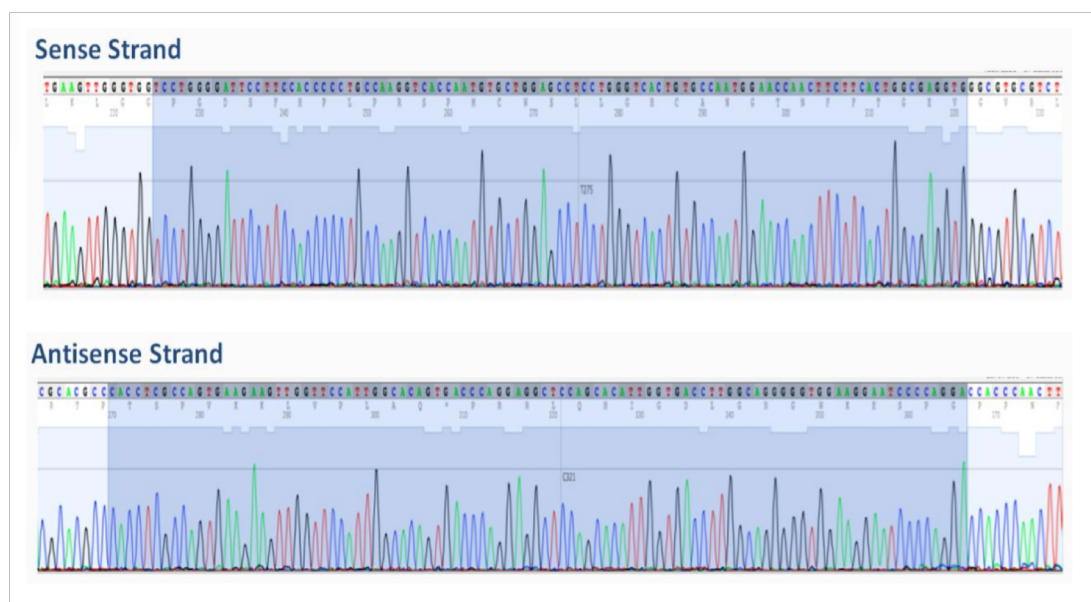

Supplementary Figure 2

A

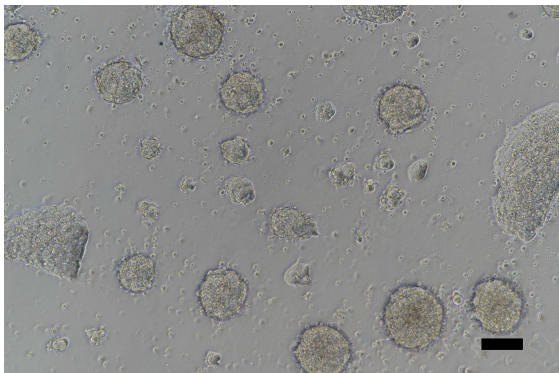

B

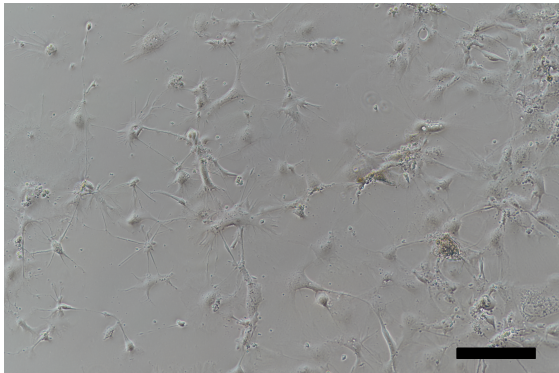

C

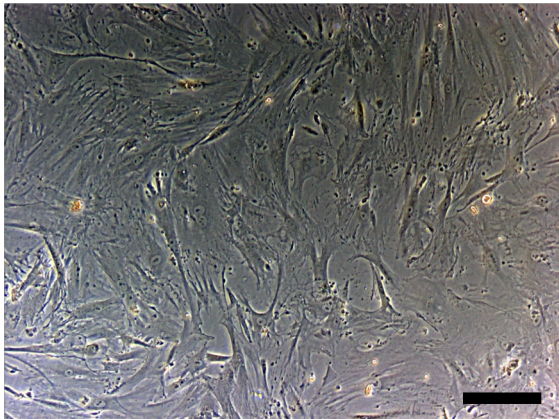

## Supplementary Figure Legend

**Figure S1.** (A) Schematic representation of donor template designing strategy. (B) Computer-generated sequencing electropherogram of *Idua* gene corrected iPSC.

## Figure S2.

Phase contrast images of gene-corrected miPSCs; (A) before inducing differentiations. (B) 21 days after spontaneous differentiation induction. (C) 21 days after fibroblast differentiation induction. Scale bars: 100  $\mu$ m

## Supplementary Information

### 1. Target sequences for Guide RNAs:

- 1) ATTCCTTCCACCCCCTGCCAAGG (20043-20065)
- 2) CTCCTGGGTCACTGTGCCAATGG (20084-20106)
- 3) AGCCCCACTTTGAAGTTGGGTGG (20012-20034)
- 4) TGGCGAGGTGGGCGTGCGTCTGG (20122-2144)
- 5) GCGTTTTTCCAGACCCTGTTGGG (19884-19906)
- 6) TACCCCTATTTACAATGACGAGG (20324-20346)

### 2. Donor Templates:

Template #1: 97 bp

5'-TCCTGGGGATTCTTCCACCCCCTGCCAAG<sup>A</sup>TCACCAATGTGCTGGAGC  
CTCCTGGGTCACTGTGCCAATGGAACCAACTTCTTCACTGGCGAGGTG-3' (20035-20131)

Template #2 213 bp

5'-GAATTACTATGATGCCTGCTCTGAGGGGCTGCGCATTGCCAGCCCCACTTTGAAGTT  
GGGTGGTCCTGGGGATTCTTCCACCCCCTGCCAAGGTCACCAATGTGCTGGAGCCT  
CCTGGGTCACTGTGCCAATGGAACCAACTTCTTCACTGGCGAGGTGGGCGTGCGTCT  
GGATTACATCTCCCTGCACAAGAAGGTGTGTGGTGCTCCAC-3' (19972-20184)

Template #3: 543 bp

5'-ATGACTTTGACAACGTGTCCATGACCACACAAGGTAGGCAGCGTTTTTCCAGACCCT  
GTTGGGTGGGCTGTATGAGAGGGAAGCAGGACAATCCCAGACCCTCAAGACCCTCC  
TGCCCTAGGCTTCCTGAATTACTATGATGCCTGCTCTGAGGGGCTGCGCATTGCCAG  
CCCCACTTTGAAGTTGGGTGGTCCTGGGGATTCTTCCACCCCCTGCCAAGGTCACC  
AATGTGCTGGAGCCTCCTGGGTCACTGTGCCAATGGAACCAACTTCTTCACTGGCGA  
GGTGGGCGTGCGTCTGGATTACATCTCCCTGCACAAGAAGGTGTGTGGTGCTCCAC  
CCCTCCCTGCCTCCTTTGAGCTGAGCCTGTACTGAGTGAGGTATGTGCTGGCTCAGG  
GTGCAGGTAGCTCCATCGCCATCCTGGAGCAGGAGATGGCAGTTGTGGAGCAGGTC  
CAGCAGCTCTTCCCTGAGTTCAAGGATACCCCTATTTACAATGACGAGGCAGACCCT  
CTGGTGGGCTGGTCCCTGCCACAACCTTGGAG-3' (19844-20386)

### 3. Validation qPCR primers:

Neo<sup>r</sup> primers:

Forward 5'-ATGGCTTTCTTGCCGCCA-3'

Reverse 5'-GAACCTGCGTGCAATCCATC-3'

IDUA primers:

Forward 5'-AGGTCACCAATGTGCTGGA-3'

Reverse 5'-CCTTCTTGTGCAGGGAGATG-3'

Sequencing primers:

Forward 5'-TAGGTATGGGCTGACACACG-3'

Reverse 5'-AAGGACCCACCTTCACCAC-3'

#### 4. Mouse Idua gene target sequence:

TGCGCATTGCCAGCCCCACTTTGAAGTTGGGTGGTCCTGGGGATTCCTTCCACCCCCTGC  
CAAGGTCACCAATGTGCTGGAGCCTCCTGGGTCACTGTGCCAATGGAACCAACTTCTTCAC  
TGGCGAGGTGGGCGTGCGTCTGGATTACA

Yellow and green highlighted sequences are targets of gRNA#1 and #2, respectively. The underlined sequence is the donor template sequence #1. The “G” in red font is in the native mouse Idua gene sequence.
